# Supplementary material
Source: publisher site journal article supplement (https://www.spandidos-publications.com/3231/downloadSupplementary)
Supplement: Supplementary file 1 [file downloadSupplementary]

## Sheet: Table SV
	Table SVI. List of the gene products in the LGI3-regulated GCN subnetworks. SUID, set user identification. Name, the official gene symbols.
	A. Group a in Fig. 5A		B. Group b in Fig. 5A		C. Group c in Fig. 5B		D. Group d in Fig. 5B
	SUID	name	SUID	name	SUID	name	SUID	name
	12015	CRYAB	8177	NFIB	2031	RCBTB1	8175	EEF1D
	7152	IGFBP2	8178	AUTS2	3823	MAPK1	8176	LRSAM1
	3574	ZAP70	8180	NPM3	9456	CALM1	8179	RPL18A
	8952	RARRES2	8181	ASH1L	2801	PTK2	8180	TAB1
	4345	SND1	8182	SLC35B2	10994	LYN	8184	RPL14
	6905	BTK	8183	IRF4	755	KRT18	8185	RABGAP1L
	6138	POSTN	8184	KDSR	2293	ERBB2	8187	RPL13
	2812	CCL2	8185	QPCT	762	TGM1	8190	RPS25
	5373	BLNK	8187	LPAR1	7420	PTGS1	8191	ZNF680
	7166	RPS6KA1	8191	DAB2	11006	ITGAX	8193	BRI3
	3583	FGF1	8193	NEK1	8447	CFD	8194	RPS9
	5632	CYBA	8194	PTGES	8960	GAS6	8198	ZNF345
	1284	AKT2	8195	STAU2	516	RELA	8199	RPL28
	263	ESR1	8196	ZNF549	1030	BAD	8200	MZT2B
	6408	TNFSF13B	8197	SAMD4B	5382	TYK2	8205	MZT2A
	9481	FABP4	8198	SIRT1	3847	MAPK3	8206	NFRKB
	9486	C1S	8199	MBOAT2	10506	KAT8	8207	RPL8
	3600	CD247	8200	SOX17	10765	CBL	8209	RPS5
	1296	IGFBP5	8201	NRIP2	5903	KIT	8211	RPL27A
	277	NCF1	8202	ANKRD37	9489	IL2RA	8212	SPATA7
	7193	ITGAX	8205	HMGA1	3603	FABP4	8213	RPS15
	11801	KAT8	8206	SSFA2	1813	PRKAA1	8218	ISLR
	4384	CYBB	8207	LMAN2L	11030	AKT1	8220	RPL11
	6180	JUN	8208	SOCS2	793	CFB	8221	BMF
	8484	SLC3A2	8209	MANSC1	2333	FGF1	8222	RPS3A
	3365	CFD	8210	PELI1	10269	CASP1	8223	RPL10
	2856	GSK3B	8211	HCFC2	798	MUC16	8224	CTPS2
	11305	PRKAA1	8212	PLXDC2	4900	PRKCA	8226	OAZ1
	11565	CTNNB1	8214	ACTR1B	6439	NFKBIA	8228	ZNF594
	4911	MAPK3	8219	LTBP2	2087	CREB1	8229	GNB2L1
	10802	CST3	8223	CYBRD1	1337	PTGS2	8230	RBM4B
	7732	SNAI2	8224	PRKCH	4409	RCHY1	8232	FANCG
	5687	KDR	8227	ITGB4	3129	CAV1	8234	ZMYM3
	12087	TYRO3	8228	LDB2	11067	POLR3D	8241	TRAPPC2
	3639	CREB1	8233	EAF2	6460	C1S	8245	ARMCX6
	826	CALM1	8234	ZNF543	10046	CCL11	8249	MFAP4
	6714	ERBB2	8237	GAPDH	11079	NCF1	8250	ENSG00000269242
	10044	ADCK1	8238	ZNF532	1864	STX1A	8252	RCN3
	3135	IKBKB	8239	PODN	2888	PDGFRA	62	MFN2
	3903	AXL	8240	KDM7A	5450	CTNNB1	64	TUBD1
	4928	INSR	8241	MAATS1	8012	NFKB1	8261	HMG20A
	6210	GAS6	8242	TINAGL1	10317	SLC3A2	70	MGST3
	8003	MITF	8243	AFAP1L2	9806	IRS1	8263	ABCC10
	5700	NCF2	8244	CTSK	6478	BLNK	8264	RPS27A
	8519	HSP90AB1	8245	ZDHHC7	591	FLI1	8266	AARS2
	8520	SERPINE1	8247	GAB1	8016	TNFSF13B	8267	FAU
	11593	MAPK1	8248	XG	6738	SEMA4D	8270	HAUS5
	6985	TIMP1	8249	C1R	1107	SND1	8271	RPL34
	4173	AKT1	8250	MMP2	8277	RPS27	8272	CEP78
	12109	TBP	8251	CAMK1D	2901	EXOG	8273	IL15
	2640	ADCK2	8252	KIAA0513	3420	JUN	8276	C12orf57
	850	MDM2	8254	PDE1A	2652	CYP2S1	8278	LRRC75B
	11098	IRS1	63	TEK	10078	EIF4EBP1	8280	SCRN1
	9819	IGF1	8256	ZNF500	6495	TBP	8281	RPL38
	9563	PTGS2	66	CCDC85A	2912	DPP4	90	BCL2L11
	7777	SLU7	8260	LYPLA1	1376	DOK1	8283	RPS24
	10083	EXOG	8261	ZNF473	6244	TYRO3	8284	C20orf96
	4708	ADIPOQ	8264	STRN	10340	ADCK2	8285	SWI5
	10599	NFKB1	72	TSHZ2	3173	ERBB3	8288	SETD4
	11880	DOK1	77	AKR1C2	4968	MTOR	97	MAP1LC3A
	12140	CEBPA	8269	ARL8B	616	LIMK1	8294	RPSA
	365	KIT	79	AKR1C1	10858	FN1	8295	TBC1D19
	6510	POLR3D	8272	ZNF417	6251	CRYAB	106	STAT2
	1902	PTK2	8276	HBEGF	5485	CCL2	8300	ZXDA
	6520	CCL21	84	ANGPT1	10605	CD68	108	CPPED1
	636	CBL	8277	FCHO2	1648	IGFBP5	8301	PLD1
	6272	FN1	87	KCTD12	1401	ZAP70	8303	RPL10A
	8832	ERN1	8279	CANX	10365	IGFBP6	8304	ZNF678
	899	CAV1	8281	ERCC8	10877	NCF2	112	MAPK8IP3
	10374	MAPK14	90	ZFYVE21	5245	IL6	8305	KIF3A
	1671	F10	8282	RDX	4225	IKBKB	8306	TTC33
	7304	MAP2K2	8284	KPNA3	10644	CYBB	115	CCNC
	6537	CASP1	92	RGS5	10133	C5	8310	RPS10
	2697	BRCA1	96	DCK	5014	CD37	8312	ZKSCAN7
	8586	CFB	99	MFGE8	8600	F10	8314	DVL2
	10636	RELA	8291	PPIL1	6554	RARRES2	8318	ZNF174
	2701	FLI1	101	ZNF18	1437	CD247	8320	RPS8
	3216	CD63	8295	ALG8	9119	IGF1	8321	RPS18
	5265	LIMK1	8299	HSPA8	6047	ERN1	8323	TMOD2
	9106	F2R	107	CEP112	1698	CSF3	8326	RFC1
	403	IGFBP6	8300	TIMM13	10664	BTK	8332	GPALPP1
	404	STX1A	108	ADGRL4	10920	RPS6KA1	8336	CCDC174
	4502	EIF4EBP1	110	HEG1	8875	ADIPOQ	8337	CEP104
	3224	SEMA4D	8303	PAICS	8364	F2R	8340	C9orf85
	8090	PDGFRA	8305	PAFAH1B2	7085	AXL	8341	CD47
	10907	LYN	8306	TM2D2	8877	LPL	151	SGIP1
	156	TAF4	116	ARHGAP31	6064	TAF4	8344	PLD2
	1184	C5	8309	IPO11	2743	GSK3B	8347	FAM185A
	7588	RPS27	118	MECOM	183	TIMP1	8350	CHRNB1
	4007	PRKCD	120	KLF7	3768	SERPINE1	164	GON4L
	8107	DPP4	121	ITGA5	7866	CD63	8358	MBOAT1
	7085	CD68	8314	NUP85	8892	PRPF19	166	HSPBAP1
	7341	LPL	122	MAP3K11	1469	CD3E	8360	TMEM42
	6320	PIK3CA	8315	SH2D3C	3773	DNAL4	8361	RNPEP
	5813	MATK	123	ITPRIPL1	9918	MITF	173	IQGAP2
	10687	RCHY1	126	MED7	1471	CD5	174	CKAP4
	1471	USP13	8320	OAZ1	8897	CEBPA	8367	SOX12
	1729	KRT18	128	NAIP	961	GSK3A	175	IL10RA
	6341	PRPF19	131	CLIC5	9154	PRKCD	8368	CLDN11
	7110	CD37	133	BCL6B	7364	KRT10	8369	DCAKD
	6855	RCBTB1	134	DIP2B	9926	SLU7	8371	LRRC2
	3530	MTOR	136	PPM1H	9162	PPARG	182	CXCL1
	10443	GSK3A	8328	ZC3H12C	3790	CSF1	8374	RSBN1L
	4812	F3	138	ZFP69	10704	CYBA	8376	ZNF354C
	9937	PTEN	139	ID2	9942	MAP2K2	185	RPL22L1
	11474	CSF1	8331	ABCA9	728	ADCK1	8377	ARPC2
	8147	PRKCA	145	FAM213B	476	CXCL2	8379	RPL29
	10708	TP53	147	TMEM143	6620	STMN1	189	LILRB5
	5845	PTGS1	149	ASB9	10205	HSP90AB1	8381	EMILIN2
	9430	TYK2	151	HVCN1	2525	CYP39A1	191	GSTO1
	6358	MLH1	8345	FBXO3	5856	AKT2	8383	BCAT1
	2775	IL6	8346	LRRC28	9443	TP53	8387	ZNF250
	9689	NFKBIA	154	TNFAIP8L1	1508	CCL21	8389	TMEM208
	7391	KRT10	8347	AIDA	231	PTEN	8390	TNXB
	2784	DNAL4	155	NFAT5			8391	ZNF391
	10978	BAD	8348	ZNF480			199	KCNAB2
	5349	STMN1	8350	HAUS6			8392	OSGEP
	9702	CXCL2	160	TRPM4			8393	COPG1
	5864	PPARG	8352	ZFYVE16			8397	SPIN3
	1001	FOXO3	8353	C2orf49			209	KYNU
	6125	CD3E	161	LETMD1			8406	ZNF346
			8355	IARS			8407	RPL26L1
			165	CNOT1			8411	ARMC6
			8357	LRRC58			220	SEMA4B
			167	HDAC9			8415	SLC25A12
			168	TUSC3			223	MCOLN1
			8363	FRMD3			8416	PDGFRL
			173	CSRNP2			224	ZBTB18
			174	STIM2			8417	PROX1
			8367	CSPP1			8418	PHYHD1
			8368	TNFRSF10D			226	OLFML2B
			176	SKAP2			8425	MUS81
			177	ARL2BP			8427	POMT1
			8370	EFTUD1			236	P3H4
			183	MAGI1			8430	DOK4
			184	SH2B1			8432	HOXA4
			8376	HSPA13			240	FKBP10
			185	HSD17B13			8435	CARF
			8378	HSPA4			8437	OXER1
			8380	COA5			245	RAB42
			8381	PSPH			246	CDH11
			190	PLK2			8439	DST
			8382	ZNF644			8440	CH25H
			8383	ZNF329			249	MRC2
			194	ZNF792			8444	ANTXR1
			197	SCYL1			252	LMCD1
			8391	NUP155			254	GPX8
			200	SLC25A30			259	COL6A1
			201	VILL			8451	KLHL23
			8393	CCT5			8452	CD28
			8394	OSTF1			8455	ISYNA1
			205	TM4SF18			8456	FBXO41
			206	CCM2L			8458	BEND5
			207	PDGFB			267	CD276
			208	SF3B2			8460	NFIL3
			8400	CCT2			8461	SPICE1
			8401	ZNF761			8462	ZNF543
			211	INO80E			8465	ADAMTS1
			8404	ASB7			8466	ENDOV
			8405	SRPRB			274	CLP1
			8408	ZNF765			8467	TCOF1
			8409	SBF2			8470	SGCD
			8411	XPO1			8471	GRIP2
			8412	BAG3			8472	NR4A3
			220	B4GAT1			8475	TRIM3
			221	COG4			284	LUM
			8414	BNIP3			8476	NPHP3
			222	PRIMPOL			8478	COL21A1
			8415	KLHL24			8480	GARNL3
			224	KAT5			290	C1orf233
			8417	GBE1			8485	EHMT2
			8418	ADCY4			294	TMED3
			226	B3GALT4			295	R3HDM4
			228	VPS51			8490	CREB3L4
			8421	XBP1			299	FAP
			230	SEC16B			301	KDELC1
			8424	CP			8493	RECK
			233	MTRF1			8494	LTBP3
			8426	HERPUD1			8497	IRF9
			8429	SAMD8			8498	RNF38
			8430	DNAJB9			8500	CCNB1IP1
			8431	SPOPL			309	TMEM200A
			8432	ATP11B			8501	NPM3
			240	SBNO1			310	DNM2
			8433	NUS1			8502	C21orf140
			242	WWC2			311	FZD2
			243	SMARCAL1			312	COL6A3
			8435	PTP4A1			8504	RPS26
			244	SLC4A2			313	MILR1
			8436	SLC39A14			314	GMFG
			8438	DNAJB11			8507	NUTF2
			8440	XPOT			316	CCDC137
			8441	NDRG1			8508	SLC22A17
			8444	TARS			8512	NYNRIN
			252	GALC			320	SCARB2
			253	ZFPL1			8513	AIP
			254	GPR132			321	SLC9A9
			255	TMEM120B			322	CAMK1
			8447	TRIM33			8514	CBY1
			8449	SERTAD2			8516	SMIM11
			258	RASSF2			325	RGS10
			8450	LCA5			8518	XYLT2
			259	AFF3			8520	DCP1B
			260	COLEC12			8523	CAPN5
			262	ADAMTSL3			8524	RUSC1
			8456	AK4			8525	DHRS1
			265	TCEANC			8527	KIAA2018
			8460	BRWD1			8528	B3GALNT1
			268	EMCN			337	CXorf21
			8461	EPRS			8530	PPP1R21
			8463	ZNF134			8534	VRK3
			271	PIGBOS1			8535	MGP
			8464	FXR1			343	NRN1
			273	GIPC2			344	P3H3
			8466	BDP1			345	HACD4
			8467	CEBPG			8538	CPEB3
			276	ZNF691			347	RHNO1
			8468	MKLN1			8539	SLC45A3
			8469	DDIT4L			348	PRRX1
			8471	PLIN2			8542	FIGNL1
			8472	ATM			8543	ANO1
			281	KL			8545	SKP2
			8474	TCAF2			8546	PRICKLE4
			282	AMOT			354	MANBA
			283	ITPR3			8548	SERP2
			284	RAD21			357	HMG20B
			8476	RCC1			8553	GLTSCR1L
			8477	ATP2C1			8554	ZNF841
			286	OSR2			8555	FXYD1
			8478	SCAPER			8556	HCN3
			8480	ABHD10			8560	LTBP4
			289	OMD			8563	ST5
			8481	OSBPL8			8564	TBL2
			8482	XRN1			8568	SYNGR1
			291	MMP3			8572	C11orf68
			8483	PRPF4B			8575	ATXN2
			8485	ABCB7			8576	ITGA11
			8487	PLOD2			386	JMJD6
			295	ECM2			390	HSPA8
			296	ZNF408			8583	CDPF1
			8489	GARS			391	PSMG3
			297	EPB41L2			8590	EFS
			298	KIF26A			8592	MDM1
			8491	PTGES3			8594	PEG10
			8492	YARS			8596	ITFG2
			302	COBLL1			8602	SMARCA2
			8494	ERO1A			413	TSEN54
			8495	PPP1R13B			8606	CASC4
			8497	MANF			415	GFOD2
			306	RNF207			8608	RAB5B
			8498	HSPE1			8609	CYP2U1
			8499	HSPA5			8610	NXPH3
			8500	CASP8AP2			8612	UBTD2
			308	NMUR1			8614	RBFOX2
			8501	PPCDC			8615	MAGED2
			310	HSD17B8			8617	TCF7L1
			8502	STIP1			8618	CTDSPL
			8503	P4HA1			8619	LIG1
			8504	CACYBP			8620	ACYP1
			313	EBF2			8626	LRIG3
			8505	CHORDC1			8627	C1QTNF4
			314	TSPAN33			436	SLC2A4RG
			8507	DNAJB1			8633	PCDHB10
			315	EPB41L1			8634	NMNAT3
			8508	ADCY6			8637	SUFU
			8509	HSPD1			8640	KIFAP3
			8510	HSPA6			8642	KCTD7
			318	RBM42			8643	NAALADL1
			320	SHISA4			8644	FAM102A
			8513	HSPH1			8645	BBS4
			323	BMP6			8646	ZNF586
			8515	FKBP4			8648	CCDC146
			8516	ARHGEF40			8649	GEMIN8
			324	CIZ1			457	STRBP
			8517	SLC16A1			8650	ADAMTSL3
			8518	SERPINH1			8651	KCNJ12
			326	ABCC6			8652	SLC17A7
			327	ZNF616			8653	ENSG00000167674
			328	GLYAT			8654	RFC5
			8523	CA12			8655	ADGRA2
			8524	LDHA			8656	PDLIM2
			8525	AARS			8657	ANKAR
			334	MUC3A			467	UQCC1
			8527	PAPOLA			470	NELFCD
			335	ADAM22			8663	PHC1
			8528	CTCF			8667	SPAG16
			336	FBLN5			8671	ZNF821
			337	S1PR3			479	HCLS1
			8529	HSPA1B			480	HCST
			8530	HYOU1			8672	CHD3
			338	RHOXF1			8673	L3MBTL1
			339	SCNN1D			482	LST1
			340	NTRK2			8678	KIF22
			8533	HSP90B1			8679	ZNF428
			8534	FAM210A			8682	DPYSL3
			342	SELENBP1			491	DNPEP
			343	PDK4			8684	C1orf35
			8536	KCNJ15			8685	PHF19
			346	KIAA1551			493	FCN1
			347	FREM1			8691	SSPN
			8539	DNAJA1			8694	SHF
			349	VPS13D			8696	STAMBPL1
			8542	AHSA1			508	OSCAR
			350	MEF2C			8703	MRGPRF
			8543	SCAND1			8704	HSD11B1L
			355	ABCA8			8706	FBLN1
			357	ZNF385B			8708	ZNF517
			8549	PDF			8709	FAM161B
			8552	PDS5B			8710	C15orf41
			360	PPP2R5D			518	SCARF1
			8553	CYYR1			519	RHEB
			361	LIG3			520	ICAM2
			8554	CCDC51			521	GRK6
			8555	ZNF33B			523	CDH13
			363	PLEKHG5			8717	CDK18
			8556	GALNT13			526	ESAM
			8558	ZNF354A			8719	TMEM234
			366	CDH5			8722	FAM117A
			367	APLNR			531	GTF2E1
			368	IFT52			532	SIGLEC10
			8561	DNAJA4			539	MYD88
			370	ANKHD1			8732	PLXDC1
			371	TFPI2			540	RGS19
			8564	HSP90AA1			541	PTPRJ
			8566	TBC1D8B			8733	MRPS16
			8568	ATF6B			542	RHOG
			8570	FAXDC2			8735	GNPAT
			8571	PTPN12			8736	ZNF782
			379	ZNF789			8738	ADAMTSL5
			8573	FLRT2			8739	C9orf9
			8577	ATP8B4			548	IGFBP4
			8580	ARHGAP42			8743	FAM13C
			8582	PRKACB			8744	TTC5
			392	TPSB2			8745	SLC27A4
			393	CPA3			8747	LRTOMT
			8587	PCDHGB2			8748	ENSG00000141854
			8589	KIAA2026			8749	GLTSCR2
			399	PCDHB4			559	ETHE1
			400	C1orf123			8752	WWP2
			407	ACCS			563	CECR1
			408	PRG4			8755	DHFRL1
			410	CAMLG			8757	ADAM33
			412	SRD5A1			568	ABCC6
			8605	MPHOSPH10			8760	CENPC
			8606	XPR1			569	AGAP3
			419	TPSAB1			570	PTPN6
			8614	INPP4A			8764	NDRG3
			423	CMA1			573	GLYAT
			8618	SMYD5			8767	VANGL2
			430	GSTA4			8769	SLIT3
			431	ZNF83			578	E2F3
			8623	SLCO3A1			579	AOAH
			434	KCTD2			8772	PCNXL2
			8626	DDX50			8774	CALHM2
			8627	TMSB10			8780	CBLN3
			8631	P3H2			8781	SNX33
			8632	CDC42EP5			8783	HOXB5
			441	NR4A3			592	CUTA
			8633	HOXB4			8787	PTGDR
			443	UACA			8790	REPS1
			8636	ANGPTL2			598	ALPL
			8637	KCND1			8791	TMEM9
			446	SLC35E1			8798	CCDC74A
			8638	ASIC3			8799	TCEAL7
			8640	BTG3			609	LILRB1
			451	CACFD1			8801	LRRC49
			454	CMBL			8803	CD34
			8646	OCIAD2			612	IGSF6
			8650	NSUN2			8806	ADAMTS13
			8652	UXS1			617	ITPR3
			463	ZNF613			8811	MAN1B1
			8655	PSRC1			8812	MATN2
			8664	C16orf58			622	LY96
			8667	CEP104			8816	KIAA0100
			8668	MSRB2			8817	PBXIP1
			476	UHRF1BP1			8818	SORBS3
			8669	CUL7			8820	HDAC11
			8671	SNX13			8822	STPG1
			8673	OCEL1			8824	C14orf159
			483	AGBL5			633	CCM2L
			8677	PIDD1			8826	MCCC1
			8678	PBX3			8827	SLC25A1
			8682	NCKAP1			8828	SH3BP1
			8688	MERTK			8829	LIPE
			8689	HFE			639	NFATC1
			498	ENSG00000234409			8831	ACSL1
			8691	CLEC4E			8833	ZNF497
			8692	MNS1			8834	C10orf88
			8693	XIAP			8835	HEPACAM
			8695	SUCO			643	ALG13
			505	DVL3			8837	PON3
			8699	PSD3			8838	ACACB
			507	AKT3			647	SMIM4
			509	RNF144A			8839	SNAPC2
			512	DPP8			8840	PCYT2
			8711	ABHD14A			8841	PARP10
			8716	ST3GAL2			8842	SUCLG1
			8717	C6orf203			8843	FAM104B
			529	CCDC40			8844	FAH
			8722	EDC3			656	PPP1R13B
			531	VPS18			8848	ACO1
			532	RPUSD2			8850	NAT8L
			537	CADM1			8851	BOC
			8730	TCF19			8852	HEBP2
			8736	ACOT7			8853	MICA
			544	RAD23B			8855	OXCT1
			547	TMEM19			8856	GHR
			8741	ZNF576			8857	CTSF
			551	KCTD20			8858	PFKFB1
			8743	YES1			8859	ZNF575
			8751	LGALS3BP			8861	DDB2
			561	MPHOSPH9			8862	OGG1
			8756	C14orf159			8863	GPD1
			8759	HSPA12B			672	CCT3
			567	CDPF1			8865	ACKR4
			571	RPAP1			8866	C16orf89
			8766	PRR12			8867	DCXR
			8767	GIPC1			677	HSBP1
			8770	DAPK1			8870	AR
			8775	PAK2			8871	ABHD15
			583	RNF214			680	RCC1
			8778	RBM19			8872	NKX3-2
			588	RNF31			683	ZFYVE16
			8781	KIF21B			8878	MEGF8
			590	EIF2B1			8879	HADH
			593	GOT2			8882	MYH14
			8785	HIPK3			8884	TUSC5
			8786	GTF2E1			8886	PLIN1
			603	INTU			8887	FAM102B
			605	C2CD5			8890	ACO2
			607	EIF2B4			8893	PLA2G16
			608	VPS39			8895	CIDEA
			8800	ERCC6L2			8899	KCNIP2
			8802	CEBPD			8900	ZNF462
			614	SRPX2			8903	RDH5
			8806	QTRTD1			8904	AHDC1
			8807	TXN2			8905	MCTP1
			616	MADD			8906	ALDH1L1
			8809	DUSP18			716	ARL2
			8811	LINGO1			8908	ITGA7
			8814	PIN1			8913	RBP4
			8815	ZFP62			726	COL15A1
			8816	STK11IP			8920	ACADS
			8817	OSBPL7			8921	UQCRH
			8818	RPS6KA3			730	MARK3
			627	ACADVL			8922	PIKFYVE
			629	2020-09-10			8924	CHCHD10
			8821	PIBF1			8928	COLGALT2
			8827	CNTROB			737	PLSCR4
			637	YTHDF3			8929	AGPAT2
			8829	HOXC6			8931	MRAS
			638	CD82			8932	BBS5
			642	ZNF175			8933	PLEKHG6
			8834	FIG4			8935	ECHDC3
			643	SETDB2			744	PIK3C2B
			8837	DPYD			745	SNRNP48
			645	DCAF10			8938	GPT
			647	KIF2A			8940	GPT2
			8839	PAPLN			8941	NGFRAP1
			648	ZNF688			749	HEATR6
			651	RAD17			750	RHPN2
			8844	FAM173A			751	WWC1
			8845	ADPRH			8943	MTHFD1
			8846	TFF3			752	CDH3
			8847	TMEM87B			8945	ACAA2
			8851	GIT2			8946	CDH6
			8853	ATG5			754	KRT8
			8855	DPH5			8949	PGM1
			8856	AP1S2			757	TNIP2
			8857	HACE1			8950	RSG1
			666	PCED1A			759	SGPP2
			8858	SPR			760	ZDHHC23
			667	ZNF606			8952	MRPL46
			8859	UNC13D			761	WT1
			8860	PNISR			8953	ZC2HC1A
			8862	SEMA5A			8954	AOC3
			672	ZNF737			763	EZR
			673	ZNF131			8955	FAS
			8865	UPF2			8956	AZGP1
			8866	PDIA3			764	CCDC64
			677	ZNF813			765	KRT19
			8871	SASS6			8957	CNNM4
			8874	NUDT4			766	CD200
			8875	ASPA			8958	SLC25A10
			683	PARD3B			8959	PC
			684	MSH6			767	GRB7
			8876	CDC14A			768	ZNF354A
			685	FOXN3			8961	CS
			8878	SPATS2			771	SLC7A1
			686	FAM171B			8963	LGALS12
			8879	TRMT13			8964	FAM89A
			8880	SRGAP1			8965	GLIS2
			8881	DENND4B			773	BANP
			689	OSGEPL1			8966	PPP1R1A
			8882	B3GALNT1			776	USP45
			8883	AUP1			778	RALY
			692	CIR1			8970	DDT
			8884	NAV2			779	DSP
			8886	FNDC3A			8971	SLC7A6
			8887	FBXL4			8973	STAT5A
			8888	MFAP3			783	CLDN1
			8889	ARHGAP33			8975	FGFRL1
			8892	POLD1			784	C6orf48
			8895	ULK4			8976	PRDX6
			8896	CCDC57			8977	RXRA
			706	UBE4A			785	CXADR
			707	SFPQ			8978	TTC38
			8899	FZD8			787	KLK8
			709	RALGAPA1			8979	PEX19
			8904	FHL1			789	PROCR
			8908	FGF18			8981	KLB
			8909	GZMM			790	C3
			717	DDX6			8983	MME
			8911	ITGA2			8984	PDHA1
			720	RANBP2			792	SLC39A8
			721	RB1CC1			8985	PECR
			8916	MEGF6			8986	PLIN4
			8917	DHRSX			8987	MAP1A
			728	TM7SF3			795	ROR2
			8923	MXD4			8988	COL9A3
			732	HMGN1			8989	GCDH
			8924	PRELP			8991	C15orf59
			8925	NBEAL2			799	PKM
			8926	ZNF316			8993	PRKAR2B
			735	PPHLN1			801	COL8A1
			8928	DUSP2			8994	PLEKHB1
			8929	DKK2			802	B4GALT4
			738	SLC16A12			8995	PNPLA2
			740	KDM1B			804	SGK1
			8932	SATB2			8997	GPAM
			8934	RFTN2			805	HAS1
			745	MAMLD1			8998	TMEM120A
			8939	ZNF618			807	ALDH1A3
			748	SLC44A1			8999	AQP7
			750	ZBTB26			9001	SMIM10L2B
			8942	ZNF641			809	SDC4
			752	MAP2K6			811	SLC16A1
			8948	MAN2A1			9003	RTN3
			8955	PAPD5			813	CDCP1
			8956	RGL4			9007	DLD
			764	WDR66			815	TMEM158
			8957	FAM117B			9009	PDHX
			8959	CD3D			818	KCNK1
			8960	NDUFB5			9010	GRTP1
			768	SCNN1B			819	MYRF
			8963	TAF7			9012	ENSG00000118804
			772	KCNIP3			820	ASPHD1
			773	AGTR1			821	TNFSF14
			774	MED13L			9014	TPD52L1
			8970	MYOF			823	KRT7
			779	ZNF574			824	TFAP2C
			8971	APOPT1			9016	APMAP
			782	BEST1			9017	ZFP30
			785	ZNF48			9019	PDE8B
			8978	PRAF2			827	C6orf132
			8982	ZMAT3			829	CCNYL1
			8984	SLC9A5			9022	ACOT2
			8985	TONSL			831	FAM83H
			794	STK17B			9024	UST
			8989	BSG			9026	ACOT4
			8993	ARHGEF1			835	DYNC1I2
			801	ZFHX3			9027	PRIMA1
			8995	ANTXR1			9030	UQCRFS1
			804	SLC38A2			9031	EPB41L4B
			805	TCOF1			9032	ORMDL3
			9000	CILP			9033	ABCD2
			9001	METTL5			9034	TST
			9002	CLK1			9036	ABCD1
			9003	LCK			844	NGDN
			812	LIFR			9037	MMD
			813	ISOC1			9038	ETFB
			9005	ANGPTL5			9040	LDHD
			9007	FMOD			9041	ADRBK2
			817	AFF1			9043	TJAP1
			9009	YBX2			851	MUC1
			9010	MYOC			852	MCTP2
			9012	COMP			9044	ATP5G3
			820	CAPZA2			9045	PTPRF
			821	HIF3A			853	FAM110C
			823	CLDN5			854	RPL35A
			824	ARRDC2			9046	SLC7A10
			9017	ACADM			9047	ADCK3
			9019	IL7R			9048	PGD
			827	RNF150			856	TNK1
			829	LRRC16A			9049	MLH3
			9022	FAM47E			9050	POLR2E
			831	HAND2			9051	ZNF397
			9024	SLC22A15			9053	GPX4
			9025	PGAP1			862	ZBTB7C
			835	NDUFA5			9054	BOK
			9027	ZMAT5			864	GATA6
			836	CALCOCO2			9057	PQLC1
			9028	FAM120AOS			866	FAM101A
			9029	BMPR2			9058	ACAT1
			837	TMEM254			9059	ACOT1
			840	ERRFI1			9061	VEGFB
			841	LONRF1			9062	MYO1C
			846	TGFBR3			870	BAALC
			9039	F8			9063	PLEKHA1
			847	CEP350			872	EIF3H
			848	TMEM260			9065	INPP5K
			9043	ALS2			874	DVL1
			852	XRCC6BP1			9066	BCAP31
			853	COL25A1			9068	SP1
			9046	CHD9			876	OSBPL2
			9048	LRP4			9069	FBXO27
			857	EGFR			9071	ECHS1
			9051	PTMS			881	TMC7
			860	RASIP1			9073	SHMT1
			9054	NAT14			9074	GYG2
			863	PPP2R5A			883	COBLL1
			864	TSC22D3			9075	PEX11A
			9056	NUDT11			9076	AIFM1
			9057	MLYCD			9077	PFKFB3
			865	TMEM133			885	SHTN1
			9061	VGLL4			887	ZSCAN9
			869	EPB41L5			9079	FFAR4
			9064	VASN			888	ZSCAN26
			872	JAK2			9080	SORBS1
			9065	NFIX			889	ZNF211
			874	CAPRIN1			9081	CPSF3L
			9067	CPQ			890	MMS19
			877	AHCTF1			891	MOV10
			9070	FBLN2			892	OSBPL7
			879	RNF152			9084	LDHB
			882	AMN1			9085	UCKL1
			9075	MFSD6			9086	PCCA
			9076	KIAA0141			895	TNFRSF25
			9077	DZIP1L			9090	ACVR1C
			885	LSM6			899	ZMYM1
			9078	SGSM3			9091	SLC19A3
			886	DENND3			9092	BBX
			9079	RFX3			9093	MIEF1
			888	C19orf68			901	GALT
			9080	ZNF668			9094	IRS2
			891	SRC			9095	HACD2
			9083	PRNP			904	TAOK2
			892	ZNF823			9096	METTL3
			9085	TSEN2			905	SPAG8
			896	MSH3			9097	PDP2
			9089	CUEDC1			906	KRBOX4
			897	PID1			9099	RNF187
			9090	CDKN2C			908	ZNF248
			898	CD59			9100	PXMP2
			900	ATG4D			910	KIAA0907
			9092	NBEAL1			9102	POLR3H
			9094	ALG10B			911	ACD
			902	OGFOD2			9103	ELOVL5
			903	RWDD2A			9104	GUCD1
			9096	TFAP2E			913	RAD9A
			906	LARP7			9106	CYB5A
			907	CAV2			915	ENKD1
			9100	CEP85			9108	HSPB7
			910	USP53			9109	TTC31
			9102	CD109			9111	TMEM132C
			911	CDC37			9114	CYC1
			9103	WDR75			9115	COX5A
			9104	DNAJC4			9116	ASPH
			913	QTRT1			9117	CXXC1
			914	HNRNPM			9118	ERV3-1
			915	MKX			9120	TRHDE
			9107	DIAPH1			9122	PDE3B
			917	CSTF3			9123	TNIP1
			9109	TTC27			932	CD55
			918	PHLPP1			9125	BTBD6
			920	SLITRK4			9126	PDXK
			9113	TRIO			9128	RAC3
			921	SMARCA4			937	ZMYM6
			9115	C1orf43			9129	MCCC2
			9117	PIGS			938	AP4B1
			9119	PDIA5			9131	DGAT1
			928	DNMT1			939	RABL2A
			929	PPP2R3B			940	ZNF471
			9121	ASAP3			9133	ETFDH
			930	MBD2			941	CDK5RAP3
			931	MAP1B			942	ANKS3
			932	UNC45A			943	HOXB3
			933	DSE			9135	GATB
			935	FKBP8			944	DDX26B
			9127	RHNO1			9136	PCK1
			936	STAG2			9138	PCK2
			938	CKB			9139	GRINA
			9131	GNAZ			9140	HINFP
			940	FBXO31			948	RAD52
			9133	ARID2			949	WDR27
			942	MAP1LC3B			9141	GPATCH11
			9134	ABLIM3			9142	STAT4
			944	ENSG00000214265			951	MBTD1
			9136	ENSG00000105520			9143	C9orf91
			946	RNF185			9144	GCHFR
			9139	TICAM2			952	TOP3B
			9140	TSPAN13			9145	ETFA
			948	CNOT8			9146	ZBED3
			949	GEMIN5			955	WDR33
			9142	MTURN			9147	SLC29A4
			9143	GPSM1			9148	SORT1
			952	MVB12A			957	RAB24
			954	MPDZ			9149	ADCY5
			9146	COLQ			9151	HSDL2
			9147	SPTAN1			960	FAM193B
			957	NCOA3			9153	SYTL3
			9150	TNNT3			962	ZNF419
			9151	MICALL2			964	KIAA0753
			959	JADE1			965	DDAH2
			960	SLC6A16			9157	ALDH6A1
			9153	PHIP			966	C12orf76
			9154	ITFG1			9158	QDPR
			963	TBX15			9159	CNTFR
			964	CELSR2			967	ZNF182
			965	WEE1			968	ZKSCAN3
			9159	ACER2			9160	PDCD7
			968	UBQLN2			9161	CLMP
			9160	GPR176			970	COPS7B
			9161	CHST14			9164	CRAT
			9162	ECH1			973	ZFP62
			971	INPP1			975	S100PBP
			9164	ZNF275			9167	IRF8
			9165	RIC1			976	ING4
			9166	ATP2B1			9168	ESYT1
			9167	BAIAP3			978	ZNF133
			977	NRP2			9171	FZD5
			9172	VWA5A			9172	GYS1
			9174	CPD			981	ZNF630
			985	LRRC6			9174	UBL7
			986	MRPL16			9175	POLR2L
			9179	RBM27			984	ZNF836
			989	ZNF548			9177	PCCB
			9182	BHLHE22			986	LUC7L3
			9183	KIAA1217			988	ZNF418
			992	NBR1			9180	TECR
			9186	CCDC109B			9181	C14orf180
			994	SNX17			989	DCST2
			9188	PDE7A			991	MYO15B
			996	THNSL1			9184	STK39
			997	BAIAP2L1			9185	ACSF2
			9190	KPNA6			993	HELQ
			1000	TSPAN4			995	FAM200A
			9194	DDB2			9188	STRADB
			1004	CEP19			997	AGAP5
			9196	LARP6			9190	LVRN
			9197	DDB1			1000	ACBD4
			9199	SPHK1			9192	ITPK1
			1007	DOCK4			9193	HP1BP3
			1010	TMEM161A			1001	SPIN2B
			9202	PPP2R5E			9194	BTD
			9204	RABEP1			1003	VILL
			1013	NFATC1			9196	EHHADH
			9205	GPN1			1005	METTL17
			9206	PIAS3			9198	APOL6
			9209	ANKRD35			9199	TMEM164
			1018	KDM5C			1008	MZF1
			9211	RTN4RL2			9200	COX14
			1019	RASA4B			9201	TKT
			1020	FAM207A			1010	IRF3
			9214	C1orf159			1012	RNF208
			1022	USP28			1013	ZNF775
			9215	ANKRD13D			9205	RTN4RL1
			1023	CDKN1B			9207	ACOX1
			1025	HADHA			1017	MSANTD2
			9218	TP53I3			9209	EMC3
			9221	GLDN			9211	S100B
			1033	FUT10			1019	LEPR
			9225	KALRN			1020	FUK
			1034	ATRAID			9212	ATP9A
			9227	STK32B			9213	ACSS3
			9228	PDE2A			9214	NDUFS1
			9229	OSBP			9215	TLCD2
			9230	FAM3C			1023	POLM
			1040	CFAP20			9216	VTI1B
			9233	FCHSD1			1025	LUC7L
			1041	ELMSAN1			9217	MAOA
			9237	NENF			9218	ZNF148
			1045	SLC40A1			9219	DBI
			9239	POFUT2			1027	ZNF808
			1047	PAIP2B			1029	ZNF83
			1050	LYG1			9221	TMEM53
			9242	SLC39A13			9223	DGAT2
			1051	CYP4F12			9224	ALDH2
			9244	DSC2			1032	ZFP2
			1052	NFE2L2			1033	DMTF1
			9245	DSG2			9225	ZNF879
			9246	TCEAL8			9226	HRSP12
			1054	ZNF423			1034	ZFP90
			1056	TSPAN9			9227	SPIN1
			9248	ANKRD13B			1035	ZNF577
			9249	GTF2F1			1036	WDR59
			1058	CHD8			1037	ZNF606
			9251	C11orf49			9229	IDH1
			1062	ATXN7L1			9231	BPHL
			9255	TRIM47			1039	BET1
			9256	MAP1A			1041	MIB2
			9257	PPP1R9B			1042	HSF4
			9258	MAP4K4			1043	CLK2
			9259	TRPS1			9236	PWWP2B
			1067	KMT2A			9237	ATP1A2
			9261	CLIP2			1045	XAB2
			1069	PDCD1LG2			9239	CABLES1
			1070	RFXANK			9241	KLHDC8B
			9262	PCDHGA12			1050	POGZ
			9263	EZH1			9243	SLC25A16
			1071	LRRC37A3			1051	CLK4
			9264	XYLT2			9244	FRMD4A
			1072	HOXC10			1053	NEIL1
			1075	CARD8			9246	TSKU
			1076	MSL3			9247	GPBAR1
			9269	C2CD2L			1055	PAN2
			1077	UNC119			9248	ZNF212
			9270	PCDHGC3			9250	SGK2
			9272	CACNB1			1058	AAAS
			1080	IQCG			1059	NSUN6
			9273	MESDC2			9252	PHYH
			1081	HHAT			9253	SUCLA2
			1082	ATXN7			1061	DPH7
			9274	CEP164			9254	AGPAT3
			1083	SLC27A4			1063	ZNF44
			9279	RIN1			9256	MDH1
			9280	ODC1			1064	CCHCR1
			1089	AK1			1065	BCS1L
			9286	PUS7L			9258	HOOK2
			1095	PRIM1			9259	ATPAF1
			9289	MAP3K12			1067	GATAD1
			1097	BTRC			9260	MMP15
			9290	POLR3B			1069	CCNL2
			9291	BMP1			9262	MGAT3
			1099	KIF17			1071	TUBGCP6
			9292	TCF3			9264	MLXIPL
			1100	TNFRSF14			1074	TAZ
			9293	GJC2			9266	GSE1
			1101	PRCP			9267	SDHC
			1102	HLTF			1076	GDPD3
			9294	SERGEF			9269	ALDH9A1
			9295	TTLL3			1078	STX16
			9296	FAM114A2			9271	PRADC1
			1104	PDE9A			1079	EZH1
			9299	UTP18			1080	DNASE1
			9300	SEC14L2			9273	ANXA6
			9301	POLH			1082	KANSL3
			9302	SSBP4			9274	BCKDHB
			9304	CEP131			1084	TTLL4
			1112	SHOX2			9277	LRIG1
			1113	C4orf33			1085	GABBR1
			1115	C10orf128			1086	PRAF2
			9308	TMEM9			9278	MLYCD
			9309	HOMER3			1087	THAP9
			1118	ZNF136			9280	POLN
			1119	HGF			1089	RRNAD1
			1120	TBX19			9283	MAP7D1
			1121	ZFAND2B			9284	MECR
			9314	TRAIP			1092	ERCC5
			9315	MINA			1093	IFFO1
			1124	KBTBD3			9286	SCRN2
			9317	SFXN3			9287	RICTOR
			1126	RUNX1T1			9288	HRASLS5
			1127	ZNF251			1097	DFFB
			9319	TIMP2			9290	KLHL31
			1128	NTN4			1099	SH2B1
			1131	HDAC1			9293	CD99L2
			9325	TSC22D4			1102	ZNF862
			1134	ERV3-1			9295	YWHAG
			9326	PCNXL2			9297	LOXL3
			1135	MSH2			1105	ITIH5
			1136	LEPR			1106	ARGLU1
			9328	APBB1IP			9298	SH3KBP1
			9330	PGAP3			9299	SDHA
			1139	PGAP2			1108	ZNF528
			1140	HIAT1			9301	SLC25A20
			1141	PAFAH2			1110	ZNF337
			9333	PPL			9304	AIM1
			1143	HOXD3			1112	LRRC37B
			9337	WNT9A			1114	INTS3
			1145	FIGNL1			1115	CHKB
			9339	GALNT12			9307	NNAT
			9340	FRMD1			9308	PPP1R1B
			1148	LSM1			9309	ANKZF1
			9341	CDON			1117	FMOD
			1150	NAB2			9310	TLN2
			1151	ZNF718			1118	PPP2R3B
			9343	HIC1			1119	HLA-F
			9344	IQSEC2			9312	ATP5S
			1152	MAPKBP1			1121	POU6F1
			1153	EXD2			9315	BLCAP
			1154	ARHGAP17			1123	EXD3
			1155	PROCA1			1124	TBC1D17
			1156	DDX49			1125	DPCD
			9348	NAGPA			1126	TNFRSF14
			9350	SMG6			1127	OFD1
			9352	PTGIS			9319	TIMP4
			1160	SEMA4F			9322	PYGL
			1161	FMO4			1130	CTC1
			9354	CCDC74A			9323	DTX1
			1163	SH3YL1			1132	SAP25
			9356	PLAC9			9325	GCLC
			1166	ARL15			1134	LRCH4
			9358	MKNK1			1135	HDAC6
			1168	ZNF250			1136	TNFSF12
			9360	TCHP			9328	G0S2
			9361	SEC24D			9329	CLK1
			1170	ZGLP1			9330	FZD4
			9362	GPR173			1140	SDR39U1
			9364	DBP			1141	CLIP3
			1172	TTC5			9333	ELMOD3
			9365	CTDSP2			1142	COLCA2
			1174	CYSLTR1			1143	ZBED5
			9367	FBLN1			1144	TDRD10
			9369	FGD1			9336	ADRA2A
			1178	HID1			1145	ZBTB48
			9370	AHNAK2			9338	SUV39H1
			9371	MAST2			1146	ADPRM
			1180	ZNF528			1147	KBTBD3
			9372	MSTO1			1149	TCEA2
			9374	ACAP3			1150	ANKRD23
			1183	ATF7			1151	RBCK1
			9375	ERCC3			9344	MIEF2
			9377	THRSP			1153	CYP2R1
			1186	SWAP70			1154	SLC25A27
			9378	HNRNPA0			1156	CENPT
			1187	CDK14			9349	ABI2
			9379	HACD4			1157	CEP95
			1188	ZMYM3			9351	FBXW11
			1189	APLF			1161	NKTR
			9383	ZFHX4			1162	DNAJC4
			1191	B3GNT8			1164	DCUN1D2
			1193	FGF11			9357	TRMT13
			9386	CD44			1168	CARD8
			1195	ITPRIP			1173	SERGEF
			1196	HEMK1			9366	DBF4B
			9388	COLEC11			9367	ECH1
			9389	MBOAT1			1176	TRIT1
			1198	ZNF471			9368	ZBTB7B
			1199	RCCD1			9369	SNAPC3
			1200	AHR			9370	PALM
			1201	H3F3A			9371	POLG2
			1203	TUBGCP2			1180	ZNF600
			9396	LLGL1			9372	CAPN10
			9398	FBXW8			1181	TTC13
			1207	C1orf112			1182	ZNF558
			9399	PAQR4			1185	ZNF18
			1208	RWDD3			1187	DGKE
			1209	ZCCHC11			9379	PANK4
			9401	WDR90			9380	ZNF318
			1210	SIGIRR			1189	C1orf131
			1213	GLE1			9382	POLDIP2
			9406	MFAP2			9383	CMAS
			1216	PDE7B			1191	CAPS
			9408	EXOSC5			1193	LZTR1
			9409	NCBP1			1194	ANXA2R
			9410	OXA1L			9386	COX7A1
			1219	NFATC4			1195	PRKRIP1
			9411	VPS9D1			1196	ADCY4
			1220	FAM122A			9388	PRRT1
			9413	IDUA			9389	AURKAIP1
			9415	FAM180A			1197	MCM7
			1225	ZNF692			1198	KLF8
			9417	ZDHHC1			1199	PPP1R35
			9418	AP1G2			9392	ZNF169
			1226	TMPO			9393	LBP
			1227	KLHL30			1203	ZNF493
			9419	NOP9			9397	PCDHB14
			1228	FAM217B			1205	ZBED8
			1229	TRIM2			1206	ZNF512
			9422	TRIM45			9400	KIAA0195
			1230	EXOC6B			9402	SLC6A8
			9423	TNXB			1214	KPNA5
			9424	ADAM33			9406	SDHB
			1233	CARF			9410	HACD1
			9425	CD276			9411	CPM
			9426	GAS7			9412	SMOC2
			1234	ARHGAP27			1222	TTC14
			1236	CDH24			9417	MTO1
			9428	RUNX3			9419	PCOLCE2
			9429	SGSM2			9420	PMM1
			9431	IL11RA			9426	SMG9
			1240	PPFIBP2			1237	GID8
			9432	AGPAT1			1238	PCMTD2
			9433	ZFAND2A			9431	STARD10
			9434	ROBO3			1240	RANBP10
			1242	PASK			9432	C2CD2
			9435	DBN1			9435	CLK3
			1243	IRF3			1243	EXOSC3
			9436	P4HTM			1244	MAL2
			9437	FAM102A			1245	GNRH1
			1246	MORN4			9438	CCNG1
			1247	TMF1			1246	SNRNP70
			9439	GIGYF2			1247	GALM
			9440	TCEA3			1248	GUCY1A3
			9441	RARG			9441	CCDC82
			9443	C6orf132			1249	SLC23A3
			1252	ZNF79			1252	RABL2B
			9444	C20orf96			9445	ZNF764
			9446	SPTLC3			1254	RBM48
			9447	TMEM98			1259	CCDC14
			9448	TSTD1			1260	XPNPEP2
			1256	NIN			9452	C20orf27
			1257	CETN3			9453	MAOB
			9449	ACTRT3			9455	YAP1
			9450	TWIST2			9458	SUN2
			1258	CLEC14A			1273	ACBD6
			9451	MRPL41			1274	XRCC3
			1259	CDK9			9466	RASSF4
			9452	TLE1			1280	PIDD1
			1261	ZNF404			9476	DCLRE1C
			9453	PLD6			1284	ZNF404
			9454	FAM180B			9479	GPD1L
			9455	LSS			9480	CNOT6
			9456	NIT2			1288	CCDC61
			1264	NLRP1			1290	ANKRD49
			9458	ATP5S			9483	CMTR2
			1267	ZFP64			9485	SLC25A33
			9459	PDGFRL			9487	NUP54
			9460	PHLDB1			1298	PLXNA3
			1268	MOSPD2			9492	NIT2
			9461	NEK11			9494	JAGN1
			9462	IER5			9495	MPP2
			1271	DHFRL1			9496	ITFG3
			9464	OLFML2A			9497	TTLL5
			9465	COPS8			9499	SLC1A3
			9466	RPE			9504	PHLDB1
			9467	EMP3			9507	PEX12
			1275	AP3M2			9509	H2AFJ
			9468	GSTM5			9511	SLC7A6OS
			1279	UBL3			1321	TMEM47
			1281	ZSCAN31			9515	UBL3
			9473	SYNGR1			1325	SMS
			1282	NES			1326	CD44
			9475	CRMP1			1329	TCTEX1D4
			1283	ZNF678			1330	THEMIS2
			9476	COX14			1331	CSPG4
			9477	EVC			9526	ATXN7L2
			1285	SYP			1335	GPR132
			9478	LRRC61			9531	ZNF354B
			1286	C6orf141			9532	FUT10
			1288	LCLAT1			9534	USO1
			9482	CNPY4			9536	NFKBIL1
			1290	PLEKHO1			1349	ALDH5A1
			1292	DNAJB4			9549	2020-03-09
			9484	GAL3ST4			9551	MTA3
			9485	C20orf27			9552	PPP1R37
			1295	BHLHB9			9553	ANKRD16
			1297	HSD11B1L			9558	CFAP44
			1298	SNX10			1368	NFU1
			9490	APIP			1369	SLC24A3
			1300	FAM26E			9561	NAPB
			9494	ARHGAP20			9562	PIAS4
			9495	KLHL36			9563	ACSS1
			1303	ADAMTS15			1372	GJA1
			1304	SSBP3			9565	GGA3
			1305	CEP78			1375	RBM19
			1306	ENDOD1			1377	LAPTM5
			9498	COPG1			9572	EPG5
			9499	IL17RD			9577	SMG7
			1307	N4BP2L1			9578	ZNF623
			1308	RND2			9581	SYNGAP1
			9500	KLHL21			9583	CAMLG
			9501	DCN			9589	ACRBP
			1309	ARL6			9590	ZNF830
			9502	SRSF7			1399	LCK
			9503	EPS8L2			9592	TRIM2
			1312	PKIG			9593	GCSH
			9504	PWWP2B			9594	MPDZ
			1313	SUFU			1404	SYTL1
			9505	FLOT1			9596	GOLPH3L
			9507	ADRA1A			9598	DLG4
			9508	S100A4			1407	TMC8
			9509	S100A6			9600	CAB39L
			1317	ZNF418			1409	RNF144B
			9510	PDE4B			9603	KDM5B
			9511	CDO1			9604	MOCS1
			1319	ZNF34			1414	PIK3R5
			1320	EPDR1			1415	TMEM254
			9513	VASP			9608	KIAA1107
			9514	PLD2			9609	RRAGB
			1323	ING4			1417	CNOT10
			9516	HSD17B10			9611	OGT
			1324	TNIK			1420	CRK
			9517	RPL21			1422	CYTH4
			1325	SUZ12			1423	CERKL
			1326	MEX3B			9615	SLC2A4
			1327	EHD2			1424	TRAF3IP3
			9519	SCRN2			1425	PTPRCAP
			9521	SEMA3G			9619	PPP1R16A
			9522	TMEM189			1427	PTPN7
			9523	ANKRD36			1429	RASAL3
			1331	MAP3K7CL			9622	KANSL1L
			9524	TTC19			1430	PARP15
			1333	OSBPL5			1431	MAP4K1
			9525	ELMOD3			1432	CD6
			9526	HOXA10			9624	RECQL5
			1334	FGFR1OP			1434	AKAP11
			9527	MSN			1435	RBM5
			9528	PEBP1			9627	MAP3K12
			9530	TICAM1			1436	SAMD10
			9531	NOSTRIN			1439	ATP2A3
			9532	RIOK3			9632	ATAT1
			9533	KCNIP2			1441	CCDC88B
			9534	PRRC2A			1442	ITGAL
			9535	FAM84B			1444	ACP5
			9536	SOX7			9636	SULT1A4
			1346	FOXC1			1445	AMT
			1347	METTL25			9638	KRBA1
			9540	LRP3			1447	ITGA4
			1349	TIA1			1450	RBP5
			1350	DMRT3			1453	TBC1D10C
			9543	ACSM5			9645	BIRC2
			1351	ATP1A2			1456	ACAP1
			9545	ESRRA			9649	SUOX
			1354	ZYX			9650	TBKBP1
			1355	TTLL1			1458	TCF7
			9547	NR2F6			1459	TREM2
			9548	RAB3IL1			9652	RSL24D1
			1356	CPXM2			9653	SAP30L
			9549	ADH5			1461	LTB
			1358	MITD1			9654	MXD3
			9550	LURAP1L			9655	INPP5B
			9551	ST6GALNAC6			1463	CCL19
			1359	ZSCAN18			9656	PLA2R1
			1361	DNAJC18			1465	PLRG1
			1362	LPCAT2			9658	PRR5
			9555	HIATL1			9660	MAPKBP1
			9556	DUSP5			9661	TPRA1
			1364	TMEM200A			1470	CD3D
			1365	KAT2B			9664	CYHR1
			1366	DARS2			1473	HLA-DOB
			1367	NXN			1474	NLRC3
			9560	FAM120A			1476	ITGB7
			1369	WDR27			1477	CARD11
			9562	EEPD1			1479	DENND1C
			1371	DCP1B			1480	DEF6
			1372	TJP2			1481	ANO9
			1373	PAQR8			1482	THOC7
			1374	YWHAH			9674	GHDC
			1375	GDPD3			1484	CD27
			1377	SLC25A12			9676	RUNDC1
			9569	HOGA1			1485	GRAP2
			1379	SMARCD3			9678	NUDT8
			9571	HOXC4			1487	RAB37
			9572	PALM			1488	GZMM
			1380	TBC1D19			9682	HEXB
			1382	FHL3			1490	DGKA
			1383	TSPAN18			9685	CEP250
			9575	SERPINB1			1493	SIGIRR
			1385	EFHC1			1495	NPIPB3
			1387	ANKH			1496	DCAF15
			1389	HDX			1499	TRAF1
			9582	WIZ			1501	ITK
			1390	ZSWIM8			9694	CDADC1
			1391	PSEN2			1503	CCDC159
			9583	PIK3C2B			1504	LAT
			1392	CAMKK1			9697	LYSMD1
			1393	KCTD7			1506	ARHGEF1
			9585	NACC1			9699	CDKN2C
			9588	AEN			1507	LSP1
			1396	APBA1			1509	CTSW
			1397	TMEM230			1510	SFI1
			9589	CHIC2			9703	KIZ
			9590	DLST			1512	CD96
			1399	CCDC121			1514	RBM6
			1400	NACAD			1516	IKZF1
			9593	CXCL8			1518	HMHA1
			1401	ZNF836			1520	CLEC2D
			1403	LARGE			9715	LDLRAP1
			1404	ZSWIM5			1525	CXCR4
			9596	IFT43			1526	LIMD2
			9598	MAD2L2			9719	EFNA1
			1407	ZNF630			1527	NPRL2
			1408	DZIP3			1528	APOBEC3D
			9601	URB1			1530	ZMIZ2
			1409	CCBL2			1531	NUP210
			9602	MRPS36			1534	PTCH2
			1411	ARHGAP1			9726	BTBD2
			9603	CNN3			1535	IPO8
			1413	LURAP1			1536	FAAP20
			1414	GUCY1A2			1537	ZNF76
			9606	SLC22A4			9729	SLCO3A1
			9607	EEF2KMT			1538	CD2
			1416	CDH13			1541	ARHGAP4
			9609	FES			9734	MRPS15
			1418	SUSD2			1543	KLHL3
			9610	FAM110B			1545	CCDC88C
			1420	DZIP1			1546	GIMAP2
			9614	CTPS1			1548	RELL2
			1422	PLEC			1549	EVL
			9615	MAP3K8			1552	ARHGAP15
			1425	CPE			1554	ATHL1
			9618	JAK3			1555	RNF166
			1427	DUSP8			9748	CBX5
			1428	IVD			1556	PCED1B
			1429	PROB1			1557	KNTC1
			9621	POLR1A			1558	STX1B
			9622	CD200			9751	CCDC142
			1430	PDGFA			1559	PLCB2
			1431	KITLG			1561	PBX4
			9624	SYNJ2			1562	MYO1G
			9625	GRWD1			1564	IL2RB
			1433	RABGAP1			1565	COLQ
			1435	MYADM			1567	FCHO1
			9627	GRTP1			1568	IL2RG
			1437	DNMT3A			1569	CD7
			9629	CAPN15			9762	STT3B
			1438	NDRG3			1571	TBC1D31
			1439	TAF6L			1572	KLRB1
			1442	KIF3C			1573	PARVG
			1443	IFT81			9766	LAMB2
			1444	HOXB3			1574	SH2D3A
			9636	INPP5B			9769	P2RX7
			9637	SAMD10			1577	KRT1
			1445	FBXL2			1579	NEK8
			9638	ENSG00000166503			9771	TLDC1
			1446	NSUN6			1581	PYHIN1
			1447	APBB1			9773	TTC21A
			1448	TMEM44			1582	BTG3
			1449	EHBP1L1			9774	CNOT4
			9641	CMIP			1583	KCNN4
			1450	RNF14			9775	CYP7B1
			1451	MBLAC2			1584	PSD4
			1452	SNPH			1586	PABPC1L
			9644	TBC1D30			9779	STX2
			9646	PIK3C2A			1589	OXR1
			1454	MOB2			9781	KIF27
			9648	SLC7A1			1590	FCER2
			1458	SARM1			9782	SIX5
			1460	C18orf54			9783	PIK3CD
			1461	TMEM25			1591	DDX46
			1462	DLGAP4			9784	DFNB31
			1464	ATP2A3			9788	TFAP2E
			9656	NOL6			9790	GRAMD3
			1465	ZNF184			1599	KLHL6
			9657	BHLHE40			1602	RIPK3
			1466	OGDH			1603	ABCA7
			9658	CRTC2			9795	GOLGA1
			1467	MICAL1			9796	BIVM
			1468	ELK3			1605	FHIT
			9661	MCTP1			1606	2020-09-06
			1470	EBF4			1610	RASGRP2
			9662	PFAS			9802	OPLAH
			9663	NUAK2			1611	PASK
			1472	CNNM2			9805	SLC25A14
			1473	FXYD6			1614	KLHL5
			1474	NEDD1			1616	SNRNP200
			9666	GJA1			1617	PCM1
			1475	BCL6			9810	FIBIN
			1477	PKNOX2			9813	HCAR1
			9669	CDK17			9814	TRIQK
			1478	GNB5			9815	UBE2W
			1482	EHD3			9818	FIGN
			1483	NAPEPLD			9820	CPNE1
			1485	DACT1			9821	PDK2
			9677	TNFRSF1B			1631	DSCC1
			1486	IQCJ-SCHIP1			9823	FZR1
			1487	FMNL3			9824	MDFI
			1488	APRT			9825	UBE2Q1
			1489	CRK			9827	CNNM3
			9683	SLC31A1			9831	PTPN3
			1492	ZSCAN26			9832	KIAA0141
			9685	ILF3			1641	SPRYD3
			1493	GPR161			9835	EFEMP1
			1494	FRY			9836	PEBP1
			1495	NRGN			1647	RGS14
			9688	PPRC1			9840	PCDHB5
			1496	PLCL1			9842	CPT2
			1497	SPOP			1651	PIM2
			1498	MED21			9845	FBXL19
			9690	SMURF1			9846	CLSTN1
			1499	RUFY3			9847	KIAA0556
			1500	INPP5A			9850	PLCD1
			1501	NAP1L1			9854	IGBP1
			1502	AHDC1			9856	TMEM106C
			9694	IER3			9859	UFL1
			1503	PLEKHA6			1669	EPHA3
			9696	SART3			9873	GPC4
			1504	DMTF1			9880	PIGP
			1505	EPHA3			1689	CPD
			9697	DDX55			1695	ITCH
			1506	PLCB3			9893	EIF3G
			1507	INMT			9894	RPL39
			1508	TXN			9899	LAMTOR4
			9701	NFKBIB			9901	INO80D
			1510	CFI			9902	ALKBH7
			9704	CUL3			1711	INPP4B
			1512	ZNF816			1726	LCP2
			1513	CCDC136			1729	GPRIN3
			1514	METTL17			9921	MED7
			1515	PELI2			1731	C4orf48
			9707	WDR74			9923	DYNC1LI2
			9708	EIF4G1			1732	POLH
			1516	KRBOX4			9930	LSM14B
			1517	PLCB4			9931	COMMD7
			9709	GNA14			9935	RAB22A
			1518	PRR14			1744	PCDHGA6
			9713	DOCK9			9938	ARL2BP
			1521	ANKRD6			1746	HEXA
			1522	S100PBP			9939	RPL15
			1524	ACTC1			9941	GNAS
			9717	SPSB1			1749	ZNF81
			9718	ZBTB7A			9943	DCK
			9719	UTP20			9944	PSTPIP1
			1527	CD9			9947	FAM192A
			1529	USP35			1761	BTRC
			1530	IFT27			9954	MAGEE1
			1531	ZNF771			9955	BST2
			1532	GRID1			1763	FKBP15
			1533	SYT11			9957	FAM114A2
			9725	KIAA1033			9958	KIAA1324L
			1534	ARL6IP1			1773	BCAM
			9726	LIMS1			9979	CCDC6
			1535	PCDHB7			9983	ADORA1
			1537	VAMP1			1791	SNAPC1
			9729	HNRNPAB			9996	LPCAT2
			1538	SEPW1			1806	C1RL
			1539	PCDHB10			9998	VPS9D1
			1540	ZFP14			1807	NRROS
			9733	ATXN2			10000	DIP2B
			1541	BBS9			1809	NT5C
			1542	ERCC1			10002	BDH1
			9735	M6PR			10003	ASS1
			1543	SETBP1			10006	PPARA
			9737	CTGF			10010	MICU1
			9741	ARHGEF26			10012	LPIN1
			1551	PFKM			10015	L2HGDH
			1552	PPP4C			10016	ZNF609
			1554	C1orf54			1826	FANCL
			1555	ZMYM1			10021	SLC4A2
			9748	CDC37L1			1830	DAD1
			1556	PSIP1			10025	ZNF688
			1557	ADARB1			10026	TENM3
			1559	MGP			10029	ANAPC7
			1560	TGFB2			10037	FAM120B
			9753	SS18L1			10042	GPR180
			1562	GMPR			10044	PI16
			9754	NSUN4			10045	IARS2
			1566	TPM4			10047	C5orf30
			9759	TFIP11			10052	CTRL
			1567	MICALL1			1861	ZNF513
			1568	ARSJ			10056	ZBTB42
			9761	KIAA0368			10057	REG1A
			1570	NYNRIN			10058	PCYOX1
			9762	IFNGR1			1867	GRAMD1A
			9763	STX16			10061	CPB1
			1571	UGDH			10064	HPD
			9764	PSME3			10066	HPN
			1572	TWSG1			10067	SERPINA1
			1573	TMEM8B			1878	JTB
			9765	POLE3			10070	PPIL4
			1574	CFAP44			10071	GPR153
			1577	SMC6			10072	CPS1
			1578	CA11			10074	CYP2E1
			1580	AGK			10075	ALB
			9772	LRRC41			10076	PIEZO1
			1582	PARD6G			1890	CCNA2
			9774	TMEM167A			10088	KLHL25
			1583	S100A16			10093	PRSS1
			1584	ABCB9			10094	PEX5
			1585	PCGF5			10095	C17orf58
			9777	PLIN3			10096	CPA1
			9778	SF3A1			10098	CEL
			1588	ARHGEF17			1908	THAP7
			9780	FPGS			10102	ITSN1
			1589	FAM117A			10104	CELA3A
			9781	HEXDC			10106	LBR
			1590	DHX35			10107	FAM199X
			9783	DRG1			1915	HDHD2
			1591	CGNL1			10108	CLPS
			1592	KLHL23			10112	BCL7C
			1593	ZNF280D			1922	ATG4B
			9787	HTRA1			1927	SSRP1
			1596	BET1			10124	SLC5A6
			9789	RDH10			10125	TMBIM1
			1598	EAPP			1936	PTPN21
			9790	ATP6V0A2			10128	JAK3
			1599	HES4			1943	USP21
			9792	FNDC4			1947	TNFAIP6
			1600	ZDBF2			1961	VPS36
			9794	FARSA			10153	MRPL18
			1602	AEBP1			1962	CXorf23
			1604	SHF			10154	TRAF2
			1605	CBX6			10155	BAG3
			9798	IMP4			10156	FAM219B
			1606	CPED1			10157	HSPD1
			1609	SPIN4			10159	RANGAP1
			9801	DDX54			10161	DNAJA1
			1610	CEP162			10162	CHORDC1
			9802	ADCY3			10163	HSP90AA1
			1611	FHOD3			10165	HSPA1B
			9804	VARS			10167	DNAJB1
			9805	FAM134B			1976	LMAN2L
			1613	RUSC2			10170	MB21D1
			9806	GEM			10172	PTGES3
			1614	METTL15			10173	DNAJB6
			1616	EN1			10174	PPID
			1617	PPM1B			10176	HSPA6
			1618	PRRT1			10178	HSPA1L
			9810	LDLRAD3			1990	ZNF532
			1619	ATG4C			1995	NUDT17
			1620	SOBP			10189	C11orf84
			9813	PELO			1997	PPIB
			1621	ARHGAP18			10190	HSPE1
			9815	SLC1A5			10191	STIP1
			1623	OTUB1			10192	AHSA1
			1624	DST			10194	HSPH1
			9816	GRPEL1			10195	DNAJA4
			9817	ZNF546			10196	CACYBP
			9818	EWSR1			2004	LRP3
			1626	PRKCDBP			2005	ZNF701
			1627	TGFB3			10197	FKBP4
			1628	CASZ1			10198	HSPB1
			1629	MS4A2			10199	ZFAND2A
			9821	APOL2			10201	IL3RA
			1631	MEIS2			10203	MARS
			9823	EXO5			2012	PTOV1
			1633	C15orf41			10206	TMEM79
			9826	NANOS1			10208	TCP1
			1636	COL21A1			10210	SOD1
			9828	PSMD9			2019	ZNF302
			9829	PUS7			10212	DNAJB4
			1637	KLF12			10213	LRIF1
			1638	SPICE1			10214	ZGLP1
			9830	POP1			10216	SPTBN1
			1639	FAAP24			2025	PRUNE
			9831	HES1			10217	SLBP
			1640	RBFOX2			10218	NKRF
			9833	QSOX2			10219	METTL21A
			1641	ZNF211			2028	CA11
			1642	SH3BGR			10221	DNAJB2
			9834	GSPT1			2030	MAMSTR
			1643	PHLDA2			10223	ZNF473
			9835	NOP56			10225	CLIC2
			9836	APOL4			2034	BNC1
			1645	ZNF518A			10226	DEDD2
			1646	SSPN			10227	NUDT9
			9838	TMEM214			2035	FAM153B
			1647	SLC45A3			10228	ACRC
			1649	MDH2			2036	FAM153C
			9842	PEX5			2037	KLK11
			9843	BTG1			10229	ACTRT3
			1651	RFX8			10230	MICB
			9844	ALPK1			2039	KLK10
			1652	RAB34			10232	YARS
			1653	CDK18			10234	SPR
			1654	HCN3			10237	C17orf67
			1655	FBXW9			2047	IGSF9
			1657	ZNF266			10239	BHLHB9
			1658	HSPA2			10241	SNX3
			1659	NBEA			2050	CLDN15
			1660	C9orf40			10242	SUGT1
			9853	MPHOSPH8			10243	FBXL14
			1662	NAP1L3			10244	HSPA4
			9855	ZPR1			2052	CARNS1
			1665	ADCY9			10245	NAA16
			9858	PINX1			2054	RASSF7
			1666	ALG6			2056	RSPO1
			1667	ENSG00000198832			10248	THAP2
			9859	BTF3L4			10249	TMEM81
			1668	RFK			10250	CCT4
			1669	C15orf52			2059	ITLN2
			1673	KCTD15			10251	BANF1
			9867	ARF6			10254	KAT2A
			1675	CORO1C			2062	CGN
			1677	SEMA3D			2063	RPN2
			9871	GCN1			2064	DAPK1
			1679	SMIM10			10256	TMEM243
			1682	PDLIM2			10257	MUM1
			9874	PTRH2			2066	ZBTB1
			1684	OAZ2			10259	WBP5
			9877	PPA1			10261	TSPYL4
			1687	LAT			10263	P4HA2
			1688	FNBP1			10264	ULBP2
			1689	ADGRA2			10266	IL20RB
			1690	RADIL			2075	RARRES1
			9882	DEDD2			10268	SERPINH1
			1691	CC2D2A			2077	YIPF4
			9883	RTN4RL1			2078	HM13
			1692	LHFP			10272	PAPOLA
			9885	EGFLAM			10273	TSHZ1
			1694	ABCB8			2082	STEAP1
			9887	LETM1			10275	MLKL
			1695	TRAF5			2085	GNG12
			9888	EIF5AL1			10277	SHMT2
			9889	CLK3			10278	NUDC
			9890	MGAT3			2088	HIAT1
			1698	LGALSL			2089	ELMO3
			9891	XPO5			2090	P4HB
			1699	LTBP3			10287	GPBP1
			9892	SYN2			2097	TMED9
			1702	FRZB			10293	P4HA1
			9894	POR			2102	MST1R
			9895	CCDC86			10294	CIZ1
			1704	CLASP2			10296	PKNOX1
			9897	WDR43			2105	RAET1E
			1705	C15orf39			10298	SIAH2
			1707	TMEM240			2107	LRRN4
			9900	PPIF			2108	NTNG1
			1708	PCNXL4			10300	MBOAT7
			1710	MFAP4			2109	RAVER2
			9902	WDR4			10302	MRPS6
			1711	PTGDR			2111	ARHGAP44
			1713	POLR2G			2112	MAPK15
			1714	MSX1			10304	HOXA2
			9906	MPDU1			2113	EPS8L2
			9907	DDX21			2114	OGN
			1715	SLF2			2115	ALDH1A2
			9908	C1QTNF1			2117	MFN1
			1716	FZD7			2118	ANXA9
			9909	MT2A			10311	TPPP3
			1717	MORN2			10312	C7orf61
			1718	SLC35D1			2121	BZRAP1
			1719	FANCI			10314	GPR89A
			9911	MYBBP1A			2124	CCDC120
			1720	CRIP2			2125	BCHE
			9913	NR4A2			2126	FGF9
			1722	ZXDA			10318	ASNS
			9914	PCDHB6			2127	DISP1
			1723	COL18A1			10319	FXR1
			9916	TSR1			2128	PLLP
			1724	TNFRSF25			10321	FAM167B
			9917	C2CD3			2130	CLIC3
			1725	ARHGEF10L			10322	SLC12A7
			9918	HMOX2			10324	UBB
			1726	FAM46C			2133	DTX3
			9921	DAPK3			2134	KLK5
			9922	COA4			10326	PLOD1
			1731	GANC			10328	MTRF1
			9923	CNRIP1			2136	KLK7
			9924	CYR61			2139	LMNTD2
			1732	CLIC4			10331	ST13
			9925	TOMM40			10333	SIRT6
			1733	FAM189A2			2142	MST1
			9927	PYCRL			10335	C11orf73
			9928	TGDS			10337	ABHD3
			1736	DKK3			2145	PKHD1L1
			9929	ETHE1			10338	APBA3
			1737	PPP1R13L			2148	MSLN
			1739	ACTN4			10341	DHX34
			9931	FGFRL1			2149	CTXN1
			1741	TBX18			2150	IL18
			9933	GRINA			2151	ATP6V0D1
			1742	KIAA1671			2152	ALOX15
			9936	SNRPD1			2153	REC8
			1744	ZNF341			2154	TMEM98
			1745	SH3BGRL			2155	NINL
			1746	SMAD9			10348	2020-09-05
			1747	FILIP1L			2157	LGALS2
			9939	C10orf2			2159	ATP7B
			9940	PAN2			10351	COL8A2
			9941	RPL7L1			2161	FBXO2
			1749	CHD3			2162	SLC28A3
			9942	SLC5A6			2165	FBXL2
			1750	IGFBP7			2167	CDK20
			9944	PARP6			2169	SERTM1
			1752	MRGPRF			2171	PRPH
			1754	SIX5			2173	CDCA7L
			1755	NKD1			2174	BEX2
			9947	CCDC97			2175	IMPDH1
			1756	EFCC1			2178	OLFML1
			9948	WRN			10370	PHYHIP
			1758	EMX2			2179	GLT8D2
			9952	NCLN			2181	NEBL
			1761	LYL1			2182	TUFT1
			9953	SPRY1			2183	SEMA3B
			9954	DKC1			2186	NOTCH3
			1762	NCALD			10378	TIMM8B
			9955	WDR3			2187	KIAA1522
			1763	NUMA1			10381	CEBPG
			9957	SLC1A3			2189	YEATS2
			1766	NR2F2			2190	MGARP
			9959	ALG3			10382	MROH6
			1768	MPP2			10383	HSD17B8
			9961	PRDX6			2192	DSC3
			9962	RRP12			2193	BCO2
			1770	JAM3			2195	OBSCN
			1771	SLC35A5			2197	TMEM151A
			1772	PLCB1			2198	MEIS2
			9964	NOP16			2199	NRP1
			9966	NAT10			2200	FLRT3
			1774	SIRT6			2203	B3GNT7
			9967	GGCT			2204	PARD6B
			9969	ACSL1			2205	CARD16
			1778	HAPLN2			10397	LSMEM1
			1779	QRICH2			2207	SULF1
			1780	MAGEE1			2209	PGM3
			9972	GNL3			10402	FAM133B
			9973	WLS			2211	GMPR
			1781	CCDC120			2212	RAB40A
			1782	ZNF138			10405	GPATCH2
			9975	DUSP1			2213	P4HTM
			9976	MT1M			2216	SPINT1
			1784	OCIAD1			2217	ICE2
			1785	RERG			2218	UPK1B
			1786	SLC37A1			10412	FAM78A
			9978	TNFRSF19			2220	RAB36
			9979	BYSL			10413	RABEP2
			1788	MAPRE2			2222	THSD4
			1789	POU6F1			2223	MRPS7
			9983	NOLC1			2225	CMYA5
			1791	ILK			2227	EPS8L1
			1792	OPHN1			2228	ABCD4
			9985	POLL			2229	FBXO44
			1793	PRPH			10422	GSTA4
			9987	ABCF2			2231	ZDHHC6
			9988	RTN4IP1			2232	INPP5D
			9989	CHRAC1			2233	GCNT1
			9991	EIF4A1			10425	SSR2
			1799	SERPINI1			2234	HEXIM2
			9992	MRPL3			2235	IFT172
			1800	NBPF1			2237	FLRT2
			9993	EIF5A			2239	KIN
			1801	RASSF3			2240	PRR15
			9994	ZNF780B			2241	SLC9A3R1
			1802	ARHGAP44			2243	GALNT9
			1803	WDR1			2244	SRGAP2C
			9995	RRP9			2245	SRGAP2B
			9996	LPIN1			2246	GATA5
			1804	FBLN7			2249	EPHB6
			1805	CROCC			2250	BST1
			9998	IFRD2			10445	IFT27
			1807	COL8A2			2257	FRAS1
			9999	PGRMC1			10450	GGT1
			10000	METTL1			2259	SEZ6L2
			1810	FHL5			10452	PDK3
			10003	TUBB6			2261	RPRM
			1811	NMNAT3			2263	DFNA5
			1812	FLNC			2265	IQCA1
			10004	ENSG00000260729			2266	QPRT
			1813	PINLYP			2267	TSPAN5
			10006	RRP1			10460	C6orf1
			1815	MEF2D			2269	AP1G2
			10007	AQP1			10462	DOCK5
			10008	PUS1			2271	TTC9
			10009	GLUL			2272	CC2D1A
			1818	MYCT1			2273	GRAMD1C
			10011	RAN			2274	ENTHD2
			1820	TNRC18			2275	DLEC1
			10014	PGM3			2278	TMEM255A
			10016	MOCOS			10471	GDPD5
			1824	CROT			2279	GOLM1
			1825	PCDHB14			2281	ROBO3
			1827	GRK5			10474	FAM195A
			1829	ENTPD1			2283	SNCA
			1830	IGBP1			2287	STAP2
			1831	DBNDD2			2290	CWC22
			1832	COPS6			2291	HSD17B6
			1834	SLC25A40			10483	FAM149A
			10028	GJC1			2292	ADAMTS3
			1836	KCNAB1			10484	TNFRSF18
			10029	EDNRB			2295	PSMA7
			1837	PGR			2296	CGNL1
			1838	TMCC2			10490	TMEM175
			10030	OPTN			2299	ERCC6
			1839	DOCK7			10493	XPO1
			10031	ROCK2			2301	PPP1R13L
			1840	TCEAL7			2303	CEP164
			10033	ADA			2305	WDR90
			1842	ATL1			2307	ADGRG6
			1843	MICAL2			2308	DYNC2LI1
			10035	FBXO18			2309	PBX3
			1845	ZNF182			2311	NYAP1
			10038	PPP2R4			2313	AMMECR1
			1846	MPND			2314	BNC2
			10039	MCM3			2316	NAPEPLD
			1848	PLS3			2317	ARL14EP
			1849	PPP1R3B			2320	DSCAML1
			10043	ZFX			10512	CCDC117
			1854	SLC22A17			2323	STK36
			1855	TRNP1			10515	SHARPIN
			1857	NCK2			2327	TSNAXIP1
			1860	ENSG00000117600			2329	MAATS1
			10054	CENPJ			10521	SIGLEC9
			1862	WBSCR17			10522	SIGLEC7
			1863	TRIM68			10523	SASH3
			1864	CAPS2			2332	NELL2
			1865	NOV			10524	FCER1G
			1867	GALK2			2334	SALL2
			10061	PARP4			10526	FOLR2
			1869	FAM129A			10528	MS4A6A
			1870	VAV2			2337	SEMA5A
			1871	C3orf70			10529	MS4A4A
			10064	QRSL1			10530	CD163
			1872	SRF			10531	F13A1
			1875	ROCK1			2340	PLEKHH2
			10068	SEC23B			10533	SLCO2B1
			1876	BOC			2341	ZBTB44
			1877	RNF180			2342	PARP16
			1878	SLIT2			10535	DOCK2
			10070	ABCD3			10536	NCKAP1L
			1881	TBC1D1			2344	ZNF761
			10074	SESN2			2345	EFNB3
			1882	LGI4			10538	TBXAS1
			1883	DYNC1I1			2347	TTC21B
			10076	CDYL2			2348	PFKM
			1885	SMYD3			10540	CD53
			1886	FAM63A			10541	ITGB2
			1887	TMEM158			10542	CSF1R
			10079	FBXL19			2351	TMEM8B
			1888	ROGDI			2352	ARMCX1
			1889	SOX15			2354	EFNA5
			10082	USP20			2356	RSRP1
			1890	ARVCF			10549	CDIPT
			1892	GULP1			2358	TCEAL2
			1893	LYSMD1			2360	TMEM136
			1894	C1orf95			10553	CKLF
			10086	TMEM144			2363	MBNL3
			1898	ANO1			10555	VSIG4
			10091	DHX8			10556	C1QA
			1899	SERP2			2364	CYP27A1
			10092	AREL1			2365	MEN1
			10093	SEPHS1			10557	C1QB
			10094	CDADC1			2366	SOX6
			1905	SRL			10559	C1QC
			10097	RNASEL			2369	ALDH3B1
			10100	PDIA4			2371	VIPR2
			1909	HAUS7			2372	KCNT2
			1910	TRABD2B			10564	YY1AP1
			10103	ERMP1			2374	ZNF765
			1911	CAPN1			2375	INADL
			1913	MYH10			2376	GSTM2
			10105	RABIF			10568	LY86
			1915	PRICKLE2			10570	FUCA1
			1916	ANKRD50			2378	ZC4H2
			10108	FAM53B			10571	CCDC84
			1917	CNNM4			2380	APOBEC3C
			1919	CIC			10572	TFEC
			1920	CAPN3			2381	CDON
			1922	ADGRE5			10574	C3AR1
			10115	PDSS2			2383	SLIT2
			10116	GTPBP8			10575	SIRPB2
			1924	NOTCH3			10576	GLMP
			1926	MTMR11			2385	EFCAB7
			10118	POLA1			2387	BMP4
			1928	KANK2			10579	MYO7A
			10120	RNPEP			10580	LYVE1
			1929	LRRC37B			10581	NPL
			1930	NUDT14			10583	CD4
			1931	C2orf68			2392	SEMA3C
			1932	TNFAIP8L3			10584	SNX20
			1933	FBXL7			2393	SGOL2
			1935	CYS1			10585	SIGLEC1
			1936	ACOT13			10586	ITGAM
			10130	RBPJ			2395	EFHC1
			1939	DUS2			10587	CD33
			10132	PDIA6			10589	CCR1
			10133	IKZF5			10590	HAVCR2
			1942	TM2D1			2398	SCARA3
			1943	TTC7B			10591	CD86
			1944	DPYSL3			2400	SSH3
			1945	ADAMTS10			10592	MSR1
			10138	SNX4			2401	ZFPM2
			1947	RASL11B			10593	CTSB
			1948	SGCG			2402	NELFA
			1949	C1QTNF2			10594	PLTP
			1950	NPTN			2404	IFT74
			1951	SYNE1			2405	PCSK4
			1952	IL17D			10597	CR1
			10144	WDR19			10598	FERMT3
			10145	ABCC10			2407	PKD2
			1953	ST5			10599	LRRC25
			10146	EIF2S3			2408	TRANK1
			10147	ZC3H13			10600	MARCO
			1956	SLAIN1			2409	BTN3A2
			10148	UFL1			10602	RNASE6
			1958	SCARF1			2411	PPFIBP2
			1960	PRRT2			10603	C1orf162
			10152	RUNDC1			2413	PAWR
			1961	NEXN			10606	ARHGEF12
			1965	FOXS1			10607	SYK
			1966	LPCAT4			2415	ZNF197
			1967	MAMSTR			10608	2020-09-10
			1970	FAM181B			10609	AIF1
			1971	RAP1GAP2			2417	CEP290
			1972	TMEM47			10611	SLAMF8
			1974	PPM1F			2419	SLAIN1
			1975	C9orf3			2420	ZNF585A
			1977	GLI2			2421	C2orf81
			10170	SEL1L			10614	FCGR3A
			1979	SYNPO2			2422	MORN4
			1981	MYH9			2423	CCDC8
			1982	PRR14L			10616	CD180
			1984	NHSL2			2425	CARS
			10177	PTPN21			2426	ANKRD36
			1985	CDH6			2428	RASSF8
			1986	MICU3			10620	TMEM150B
			1987	MRS2			10621	DOK2
			1989	PBXIP1			2431	FAM200B
			1990	STARD9			10624	TRIM14
			1991	TNFSF9			2432	MCM9
			1993	FGD5			10626	FAM105A
			10185	MBTPS2			2435	RNF111
			1994	SUSD5			10628	EVI2A
			1995	MLPH			10629	IRF5
			1996	CIB2			10630	ADAP2
			1997	PFKP			2438	CEP44
			1999	LRIG3			2439	AJUBA
			2001	RNF112			10633	GPR34
			2003	FCHSD2			2441	SLC25A30
			2004	DMPK			10634	TMIGD3
			2007	TES			2442	ZNF280D
			2009	C12orf75			10635	ADCY7
			2010	DHFR			2443	REEP1
			2011	VCL			10636	STAB1
			2014	NFASC			10637	PSAP
			2017	LTBP4			2445	ZNF420
			2020	LDOC1			2446	GJC2
			2021	ATP10D			10639	FGD2
			2022	PPIH			2447	ZNF260
			10215	PKN2			10641	RNASE1
			10216	CNKSR2			2449	TMEM240
			2024	RBM22			10642	CARD9
			2025	CTXN1			10643	ST14
			2027	GNAI2			2451	CACNB3
			2029	MN1			2452	ACAP3
			2030	AAMDC			2454	DENND6B
			2031	MSRB3			2455	TMEM246
			2032	RPS6KA5			10648	SCIMP
			2033	DXO			2458	FAXDC2
			2034	MRPL19			10650	CD300C
			10227	DDX46			2460	BBS2
			2035	TRPC1			10652	TYROBP
			10228	ZNF148			10653	LMO2
			2037	ENAH			2461	AP3D1
			2039	AMIGO2			10654	CTSS
			10231	FGGY			2462	ESRRA
			2041	LYRM1			2463	INMT
			2042	ADRA2C			10656	SLC37A2
			10235	DYRK3			2464	SLC4A3
			2043	SYTL2			10658	STAC3
			2045	SALL2			10659	TMEM106A
			2046	IFI16			2467	C19orf44
			2047	TMEM135			2468	SLC26A6
			2048	LNP1			10661	MPP1
			2049	CFAP36			2469	AGRN
			2050	ATP8B1			10662	CD84
			10242	ZRANB1			2470	TOR1AIP2
			10243	MTM1			10663	KCNQ1
			2051	FBXO44			2472	DMKN
			2053	MYO9A			2473	SMO
			2054	DLG3			2474	FZD7
			2055	MARVELD1			10667	FCGR2B
			2056	GDPD5			2475	SLC4A4
			10249	HDHD2			10668	BDP1
			2059	FOXL1			10669	CRYBB1
			2061	RERGL			10670	PIK3AP1
			2062	KLHL13			2478	RARRES3
			10255	SRPK1			10671	SLC7A7
			2063	SNCAIP			2480	PRKCI
			2065	CCDC85B			10673	CPVL
			10257	ADSS			2482	WDR11
			2066	FEZ1			10676	GLB1
			10259	HPS3			2484	PIP5K1B
			10261	C16orf45			10679	TPP1
			2069	LPP			2487	LRP11
			2070	PAK4			10681	FPR3
			2071	PDE3A			2490	DNM3
			2076	HCFC1R1			2491	LDB1
			2077	2020-09-05			10683	CTSZ
			2080	KAZALD1			10684	GRN
			2082	CAMK2G			2496	ANKRD29
			2085	MUSTN1			2497	TPBG
			10277	PLCG1			10690	CCDC130
			2086	ZFAND6			2499	CEP97
			2087	PHF1			2500	PTPN13
			2089	HEPH			2501	UBA52
			10282	AARS2			2502	MAGI3
			2090	FAM63B			10694	TTYH3
			2091	CUTA			10695	ARSB
			2092	GARNL3			10696	CREG1
			10284	OSGEP			2504	BBS12
			2093	NME4			2506	GGT7
			2094	JAG1			10698	LILRB4
			2095	PHYHIP			10699	UNC93B1
			2098	GIPC3			2507	LSAMP
			10292	BRD8			10701	VAMP8
			2101	MUTYH			2509	NEK11
			10293	LRRN4CL			10703	AP1B1
			10295	CRLF3			2511	NFXL1
			10296	FCER2			2513	HKR1
			2105	C2orf40			10705	NAGA
			10297	LUC7L			2514	LZTFL1
			2107	TEAD3			2515	PFAS
			10300	LRCH3			10708	SYNJ1
			2109	MRVI1			10709	LGALS9
			2110	GALT			2517	SERAC1
			10302	CCDC88C			10712	RENBP
			2113	EEA1			2520	NHSL1
			10305	NF1			2522	TRPC1
			2114	TMEM35			10715	TNFSF8
			10307	MFSD4			2523	PAPOLG
			2115	POGZ			2524	BTN2A1
			2116	PIP4K2C			10718	EBI3
			10308	COX4I2			2527	C11orf80
			2118	POLG2			10720	GLIPR1
			10310	SCN4B			10721	GAA
			2119	TGFB1I1			10723	TSPAN33
			10312	ENSG00000135747			2532	ZFP82
			2121	SIX1			2533	RIPK4
			2122	BVES			10725	MFSD1
			10314	PURA			10726	CD14
			2123	SIRT5			10727	STX8
			10316	ANKRD29			2535	SMTNL2
			2125	CARNS1			10728	RBM47
			2126	TMEM246			2537	ADGRD1
			10319	CTNNBL1			10730	SLC46A1
			10320	CMAS			10731	MAN2B1
			2128	PRDM16			2540	RTKN
			2129	RCAN2			10733	RPS20
			10321	EFCAB14			10735	MS4A7
			2131	GPRASP1			10736	DGCR6L
			2132	SLC17A7			2544	MORN1
			2133	CALD1			2547	PHLPP2
			2134	FOXP1			2549	LPAR5
			10326	CLEC3B			2551	ANKRD36C
			2135	CAND2			2552	TRAF5
			2137	RAB24			2553	DHPS
			2138	GATA6			2554	APLP1
			2139	L3MBTL1			10746	CTSD
			10331	GNLY			2556	ZNF33B
			10332	GNG11			10749	RASGRF2
			2141	CSDC2			2558	PPM1G
			10334	REM1			10750	P2RY6
			2142	TACC1			2559	ZNF823
			2145	SV2A			10751	POLR2G
			10338	BLMH			2560	C14orf79
			2146	C11orf80			2562	ZNF443
			10340	TMEM74B			10754	MACROD1
			2149	FOXC2			10755	CA8
			2150	LMOD1			2564	KCNK5
			2151	KIAA1328			10757	MORN2
			10343	SUGP1			2566	MEIS1
			2153	MYOM1			2567	UBN2
			10346	R3HCC1L			2568	C5orf42
			2154	SH3GLB2			2570	ZNF506
			2155	STX5			10762	HAUS4
			2156	STK19			10763	SPI1
			10348	AKAP10			10764	HCK
			2157	ANTXR2			2572	UPK3B
			10349	ASNSD1			2574	WDR34
			2158	CACNA1H			10767	POLR2H
			10350	DNAJC17			10769	FCGR2A
			2159	CDK10			2578	SH3GLB2
			2160	FAM219B			10771	SGTB
			2161	CCDC102A			2581	FRMD4B
			2162	TNFSF12			2582	ZNF790
			2163	DOK4			2584	SMIM1
			2164	TIFA			2585	KLHL28
			2166	ZNF777			10777	FBXO32
			2167	PDE5A			2587	FUZ
			2168	CACNA1C			2588	RBM41
			10360	SETD2			10781	TRUB1
			10361	GPBP1L1			10782	L1CAM
			2170	LMO2			2591	SLC16A4
			10362	NSMCE2			10785	NUDT14
			2171	CAP2			2594	MED21
			10366	DIABLO			10786	CHMP4A
			2174	BZRAP1			2595	SGCE
			10367	RNF34			2600	ZNF225
			2176	BCAM			2603	DMAP1
			10369	DYNC1I2			2604	ZNF496
			2178	ISYNA1			2608	SP3
			2180	INPP4B			10801	ALOX5AP
			10373	CCDC117			2609	SNCAIP
			2181	VPS50			2611	ATF2
			2182	WNK1			2612	ITGA3
			2183	DGKG			10805	PLEK
			2184	STRADA			10806	CLEC10A
			2186	RALGPS1			2615	GRIK5
			10379	EIF4A2			10807	FKBP8
			2188	SORBS2			2616	EIF3E
			10381	USO1			10809	VAV1
			2189	EDIL3			10810	APOBEC3A
			2192	PRKAA2			2618	ZKSCAN4
			2194	ARPC1A			2619	OBSL1
			10387	CRYL1			10811	S100A9
			2195	TAGLN			10814	S100A8
			2196	ESAM			10815	PROK2
			10388	RANBP6			2623	TDRP
			2197	ADGRL3			2625	NDUFAF1
			10389	ANK2			2626	EVC
			2198	KCNQ4			10819	IL18RAP
			10390	ZCCHC8			2628	ZNF626
			10392	RSRC2			2629	ANKRD13B
			2200	PLN			10821	CXCR1
			2201	FUK			10822	SORL1
			2202	DPP9			2631	PGAP2
			2203	WFDC1			10824	CXCR2
			2205	TMEM14A			10826	SELL
			2206	DSTN			2634	TRIM68
			2207	ANKRD16			10828	ADGRG3
			2208	PRUNE2			2638	SLC35A3
			2209	MDGA1			10830	VCP
			2210	ZNF414			2639	VSIG2
			2211	NXPH3			10831	MMP25
			2212	CA8			2641	ZNF445
			2214	DNAJB5			10834	TNFRSF10C
			2215	FAM193B			2643	MKS1
			2216	FBLIM1			2644	SUDS3
			2217	MACROD1			10837	TREM1
			2218	SVIL			10839	FCAR
			2221	PDAP1			10840	FPR1
			2222	NTRK3			2649	TCF12
			2224	NME3			2650	CDK14
			10416	PHF20			10842	NHP2
[truncated: 3,907 more rows]
